# Supplementary material
Source: PubMed Central journal article supplement (PMC514457)
Supplement: pnas_101_33_12201__1.pdf [file pnas_101_33_12201__1.pdf]

(A)

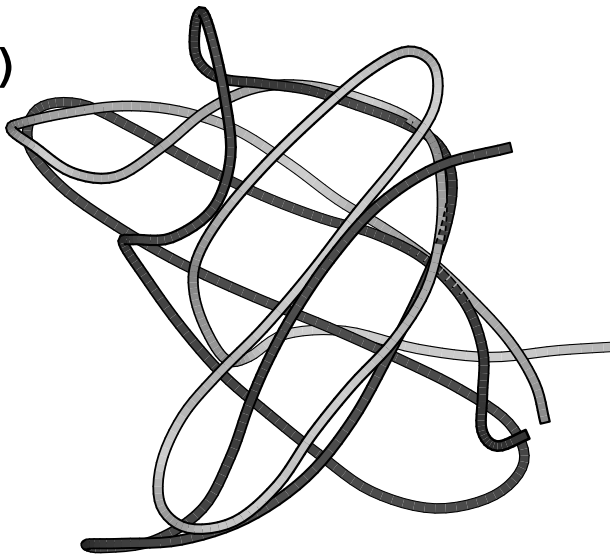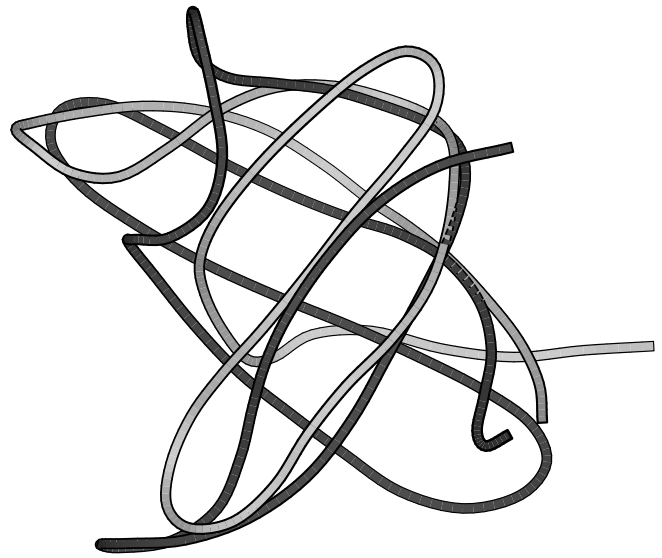

1mjc SGKMTGIVKWFNADKGFGITPDDGSKDVFVHFSAIQNDGYKSLDEGQKVSF-TI  
 1shf --VTLFVALYDYEARTE-----DD-----LSFHKGEKFQILNS

1mjc ESGAKGPAAGNVTSL-----  
 1shf SEG---DWWE-ARSLTTGETGYIPSNYVAPVD

(B)

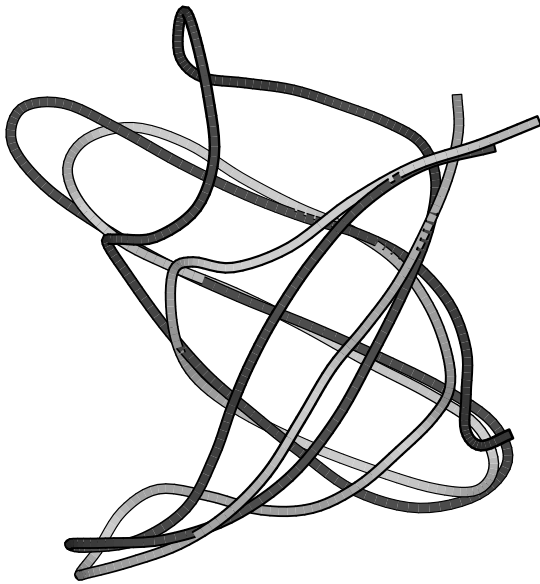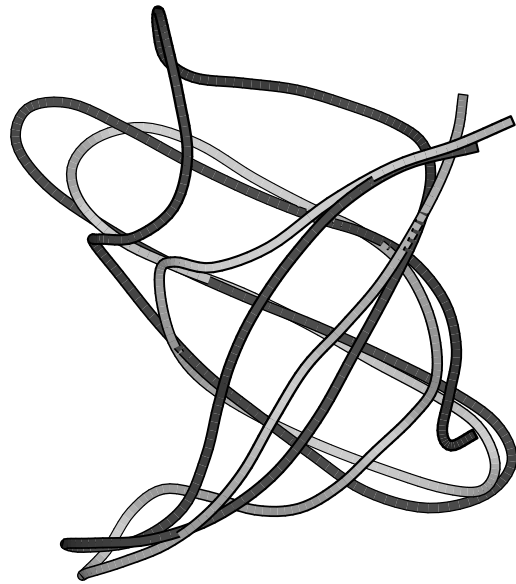

1mjc -----SGKMTGIVKWFNADKGFGITPDDGSKDVFVHFSA  
 1shf VTLFVALYDYEARTEDDL S F H K G E K F Q I L N S S E - G D W W E A R S L T T G E T G Y I P S N Y

1mjc IQNDGYKSLDEGQKVSFTIESGAKGPAAGNVTSL-  
 1shf -----VAPVD
