# Supplementary material
Source: PubMed Central journal article supplement (PMC514457)

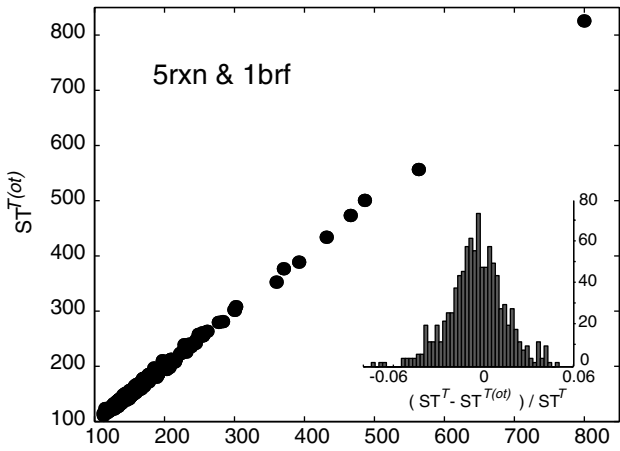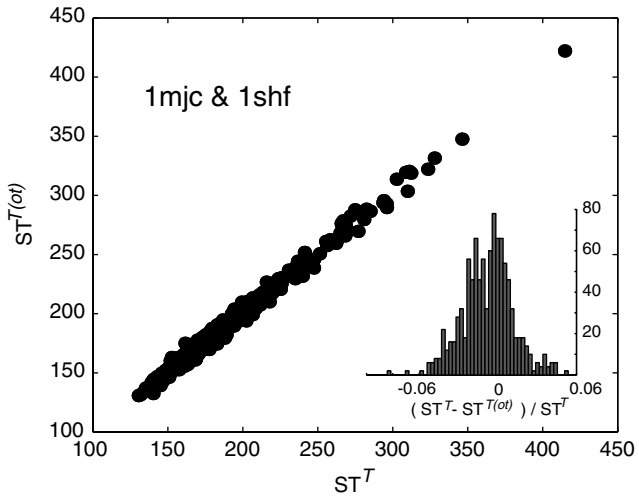

Supplement: pnas_101_33_12201__2.pdf [file pnas_101_33_12201__2.pdf]
